# Supplementary material for: Structure‐function analysis of two closely related cutinases from Thermobifida cellulosilytica
Source: PubMed Central journal article supplement (PMC9299132; doi:10.1002/bit.27984), 2021-11-17
Supplement: BIT-119-470-s001.pdf [file BIT-119-470-s001.pdf]

## Supporting information

### Structure-function analysis of two closely related cutinases from *Thermobifida cellulosilytica*

Jenny Arnlind Bååth<sup>1\*</sup>, Vera Novy<sup>2\*</sup>, Leonor Vieira Carneiro<sup>2</sup>, Georg M. Guebitz<sup>3</sup>, Lisbeth Olsson<sup>2</sup>, Peter Westh<sup>1</sup>, and Doris Ribitsch<sup>3†</sup>

<sup>1</sup> Department of Biotechnology and Biomedicine, Technical University of Denmark, Søtofts Plads, DK-2800 Kgs. Lyngby, Denmark

<sup>2</sup> Wallenberg Wood Science Center, Division of Industrial Biotechnology, Dept. of Biology and Biological Engineering, Chalmers University of Technology, Kemivägen 10, SE-412 96 Gothenburg, Sweden

<sup>3</sup> Institute of Environmental Biotechnology, University of Natural Resources and Life Sciences (BOKU), Konrad Lorenz Straße 20, 3430 Tulln, Austria

\*Contributed equally

†Corresponding author

#### Supporting material includes:

Figures S1-S11: Pages S2 to S12

Tables S1-S3: Pages S13 to S15

|            |     |                                                       |     |
|------------|-----|-------------------------------------------------------|-----|
| EMBOSS_001 | 1   | MANPYERGNPTDALLEASSGPFVSVSEENVSRLSASGFGGGTIYYPRENN    | 50  |
|            |     |                                                       |     |
| EMBOSS_002 | 1   | MANPYERGNPTDALLEARSFGADGFGGGTIYYPRENN                 | 50  |
|            |     |                                                       |     |
| EMBOSS_001 | 51  | TYGAVAI SPGYTGTEAS IAWLGERIASHGFVVITIDTITTLDQPDSRAEQ  | 100 |
|            |     |                                                       |     |
| EMBOSS_002 | 51  | TYGAVAI SPGYTGTQAS VAWLGERIASHGFVVITIDTNTTLDQPDSRARQ  | 100 |
|            |     |                                                       |     |
| EMBOSS_001 | 101 | LNAALNHMINRASSTVRSRIDSSRLAVMGHSMGGGGTLRLASQRPDLKAA    | 150 |
|            |     |                                                       |     |
| EMBOSS_002 | 101 | LNAALDYMINDAASSAVRSRIDSSRLAVMGHSMGGGGTLRLASQRPDLKAA   | 150 |
|            |     |                                                       |     |
| EMBOSS_001 | 151 | IPLTPWHLNKNWSSVTVPTLIIGADLDTIAPVATHAKPFYNSLPSSISKA    | 200 |
|            |     |                                                       |     |
| EMBOSS_002 | 151 | IPLTPWHLNKNWSSVRVPTLIIGADLDTIAPVLT HARPFYNSLPT S ISKA | 200 |
|            |     |                                                       |     |
| EMBOSS_001 | 201 | YLELDGATHFAPNIPNKIIGKYSVAWLKRFVDNDTRYTQFLCPGPRDGLF    | 250 |
|            |     |                                                       |     |
| EMBOSS_002 | 201 | YLELDGATHFAPNIPNKIIGKYSVAWLKRFVDNDTRYTQFLCPGPRDGLF    | 250 |
|            |     |                                                       |     |
| EMBOSS_001 | 251 | GEVEEYRSTCPFALE                                       | 265 |
|            |     |                                                       |     |
| EMBOSS_002 | 251 | GEVEEYRSTCPFALE                                       | 265 |

**Figure S1. Amino acid sequence alignment of *The\_Cut1* and *The\_Cut2*.** Amino acid differences are marked in yellow, the catalytic triad in blue, and the residues constituting the oxyanion hole in green.

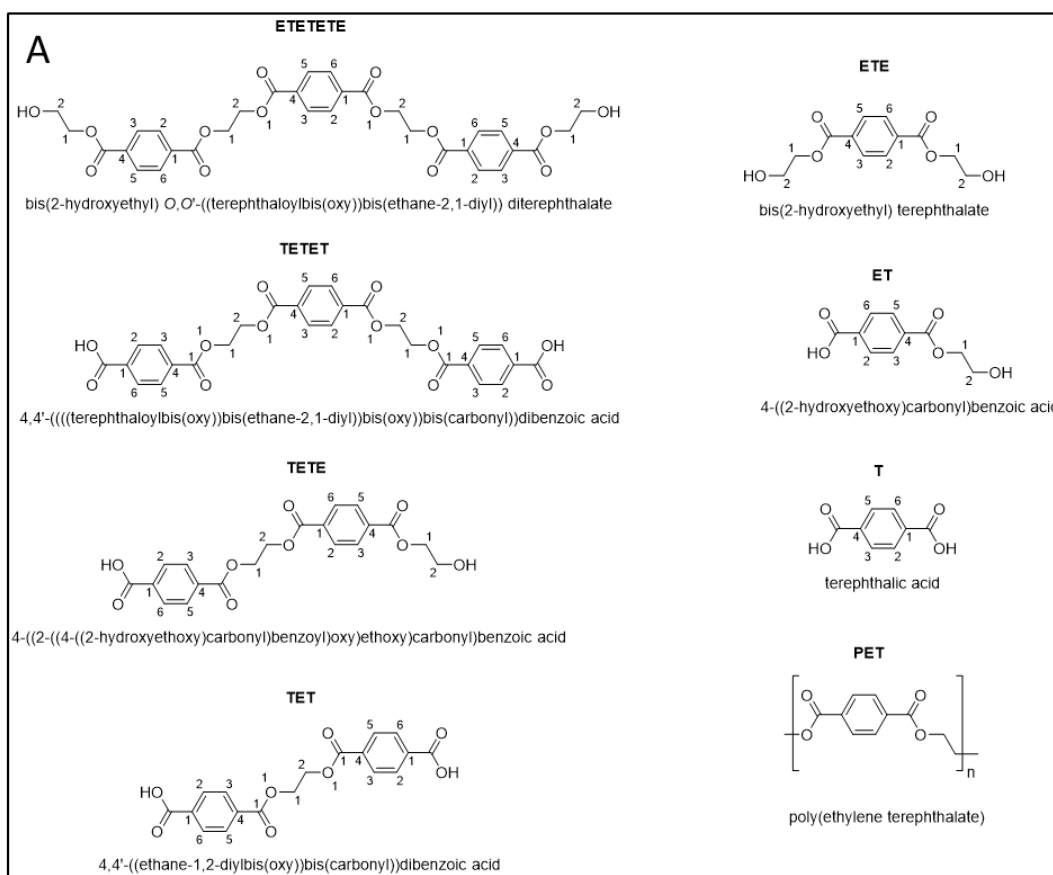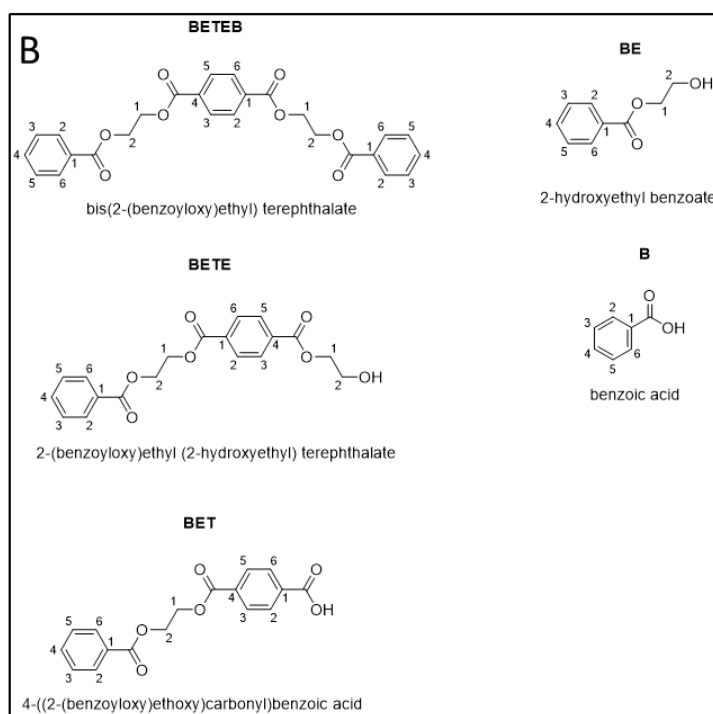

**Figure S2. Chemical structures, abbreviations and full chemical names of PET and PET model compounds used as substrates in enzyme reactions and/or standard samples in RP-HPLC analyzes. Box A contains PET and possible degradation products, whereas box B contains the model substrate BETEB and degradation products. It should be noted that T, ET and ETE are possible reaction products from both PET and BETEB hydrolysis.**

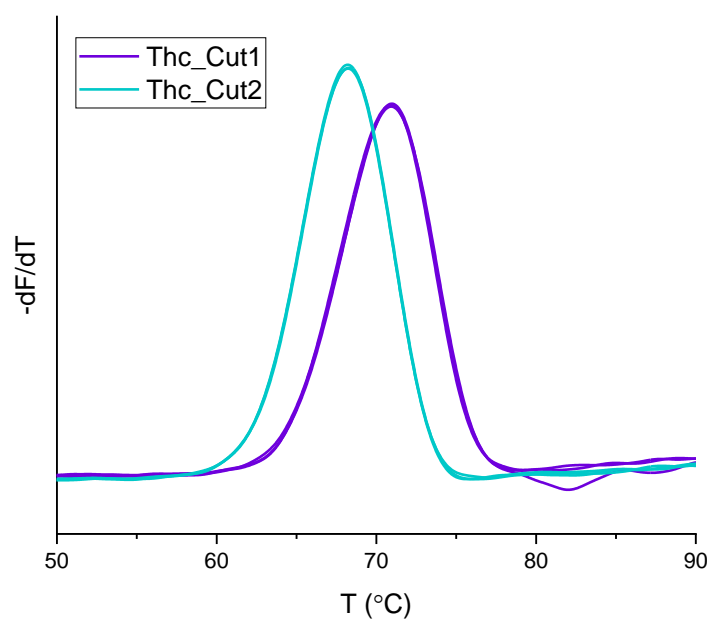

**Figure S3. Melt curves derived from the 350/330 nm fluorescence ratio** (overlay of triplicate measurements) showing  $T_m$  values of 71 and 68 °C for Thc\_Cut1 (purple) and Thc\_Cut2 (turquoise), respectively.

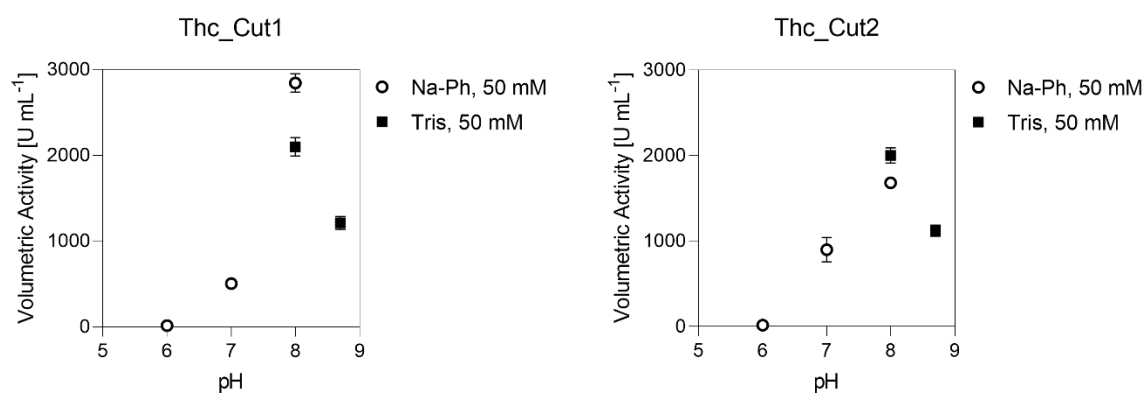

**Figure S4. pH profile of Thc\_Cut1 and Thc\_Cut2.** Activities were measured against pNP-C8 at 3.125 mM substrate concentration. Sodium phosphate (Na-Ph) and tris-Hcl (Tris) buffers were used at 50 mM concentration, as indicated. Data represent mean values from duplicate experiment, error bars indicate the spread.

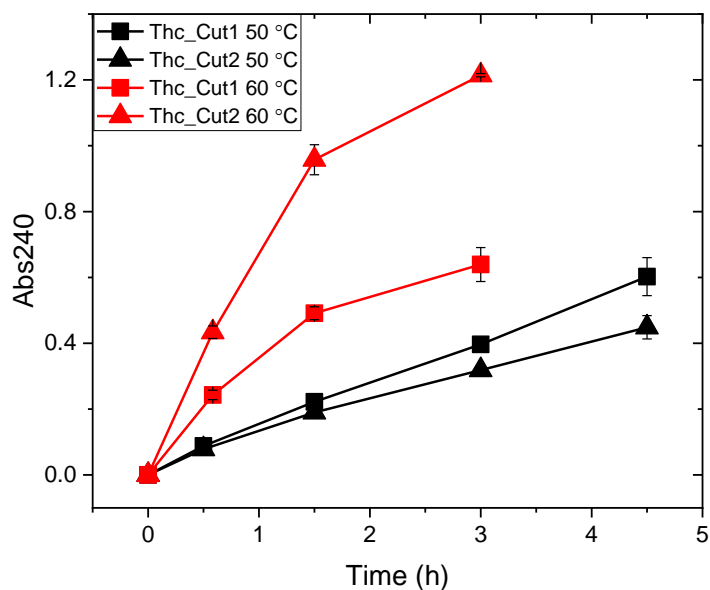

**Figure S5. Progress curves** from enzymatic PET hydrolysis for Thc\_Cut1 (squares) and Thc\_Cut2 (triangles) at 50 °C (red) or 60 °C (black) over 4.5 h. The graph represents curves when PET is in excess (20 g/L PET, 0.1  $\mu$ M enzyme). Data point represent mean values of duplicate experiments, error bars indicate the spread. MM analyzes were conducted within the time of the linear range for respective enzyme and temperature (steady-state).

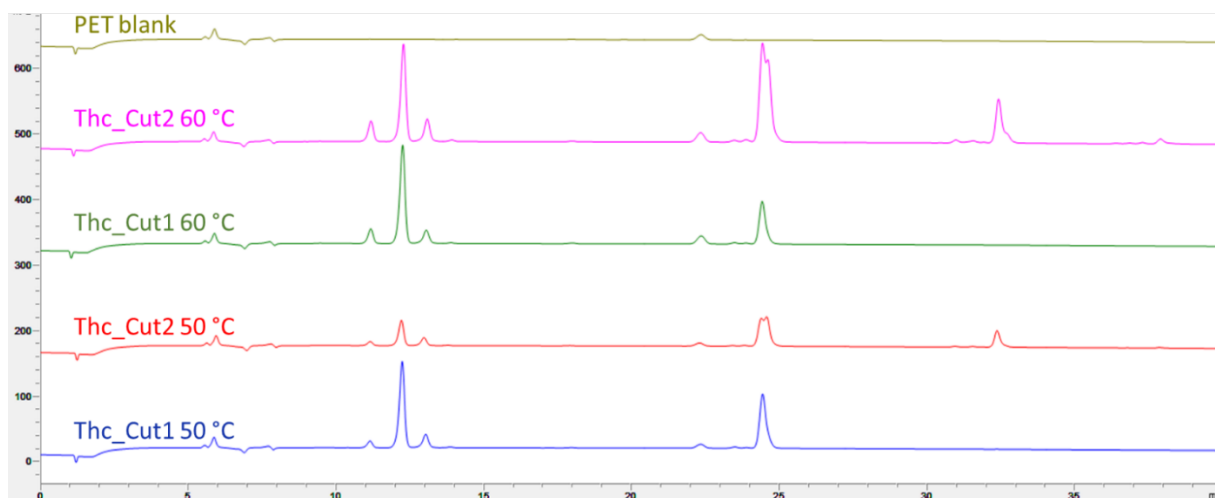

**Figure S6. Product profiles from RP-HPLC analysis of enzymatic PET hydrolysis over 3 h at 50 or 60 °C with 20 g L<sup>-1</sup> PET and 0.1 μM enzyme. Major peaks in the product profile correspond to (from left to right): T, ET, ETE (between 11-13 min), TET/E (species with two aromatic rings at 24 min) and E/TETET/E (species with three aromatic rings, only seen in Thc\_Cut2 reactions at 33 min).**

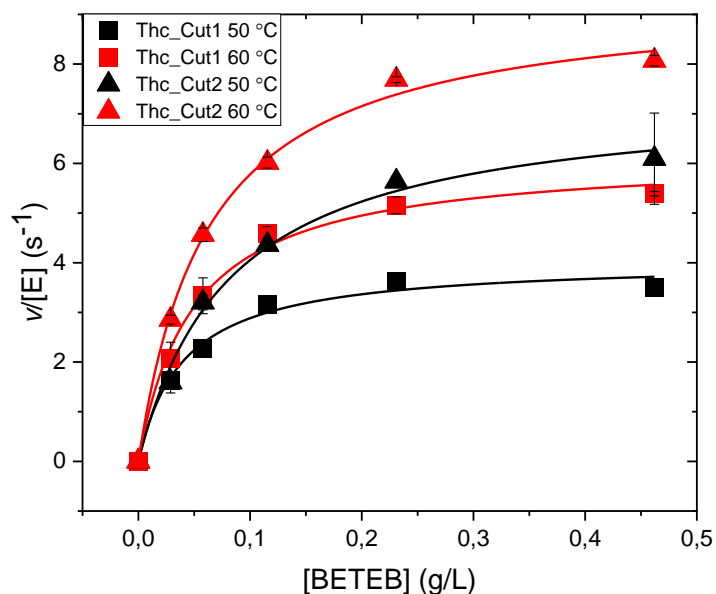

**Figure S7. MM plots for Thc\_Cut1 (squares) and Thc\_Cut2 (triangles) with initial hydrolysis rate as a function of BETEB concentration.** Symbols are experimental data from 15-20 min reactions at 50 °C (black) or 60 °C (red) with 0.005 and 0.01  $\mu\text{M}$  enzyme for Thc\_Cut2 and Thc\_Cut1, respectively. Data points represent the mean value of duplicate measurements, the error bars indicate the spread. Lines represent the best fit of the non-linear MM equation.



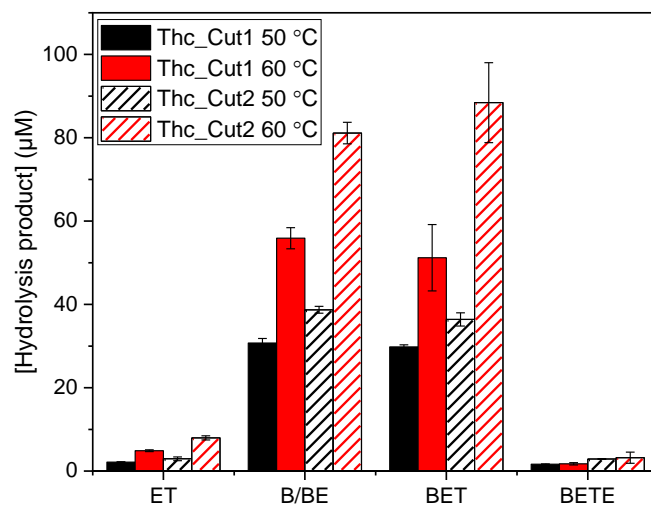

**Figure S8. Product quantification from RP-HPLC analysis of BETEB hydrolysis** by ThC\_Cut1 (filled bars) and ThC\_Cut2 (striped bars) over 20 min at 50 (black) or 60 °C (red) with 0.5 g L<sup>-1</sup> BETEB and 0.01 µM enzyme. Data represent the mean value of duplicate measurements, the error bars indicate the spread.

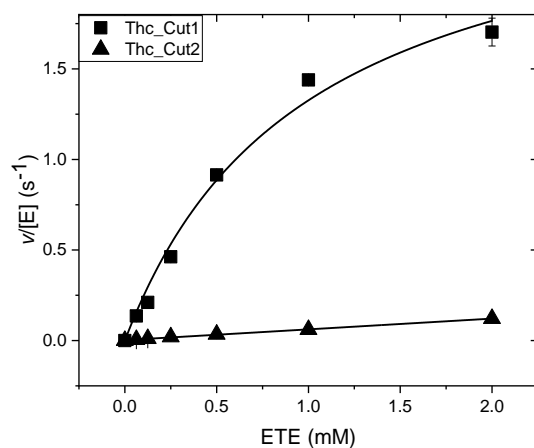

**Figure S9. MM plots for Thc\_Cut1 (squares) and Thc\_Cut2 (triangles) with initial hydrolysis rate as a function of ETE concentration.** Symbols are experimental data from 15 min reactions at 50 °C with 0.5 and 0.1  $\mu\text{M}$  enzyme for Thc\_Cut2 and Thc\_Cut1, respectively. Data point represent the mean value of duplicate measurements, the error bars indicate the spread. Data for Thc\_Cut1 are fitted with the non-linear MM equation whereas data for Thc\_Cut2 could not be saturated up to 2 mM ETE and therefore fitted with linear regression.

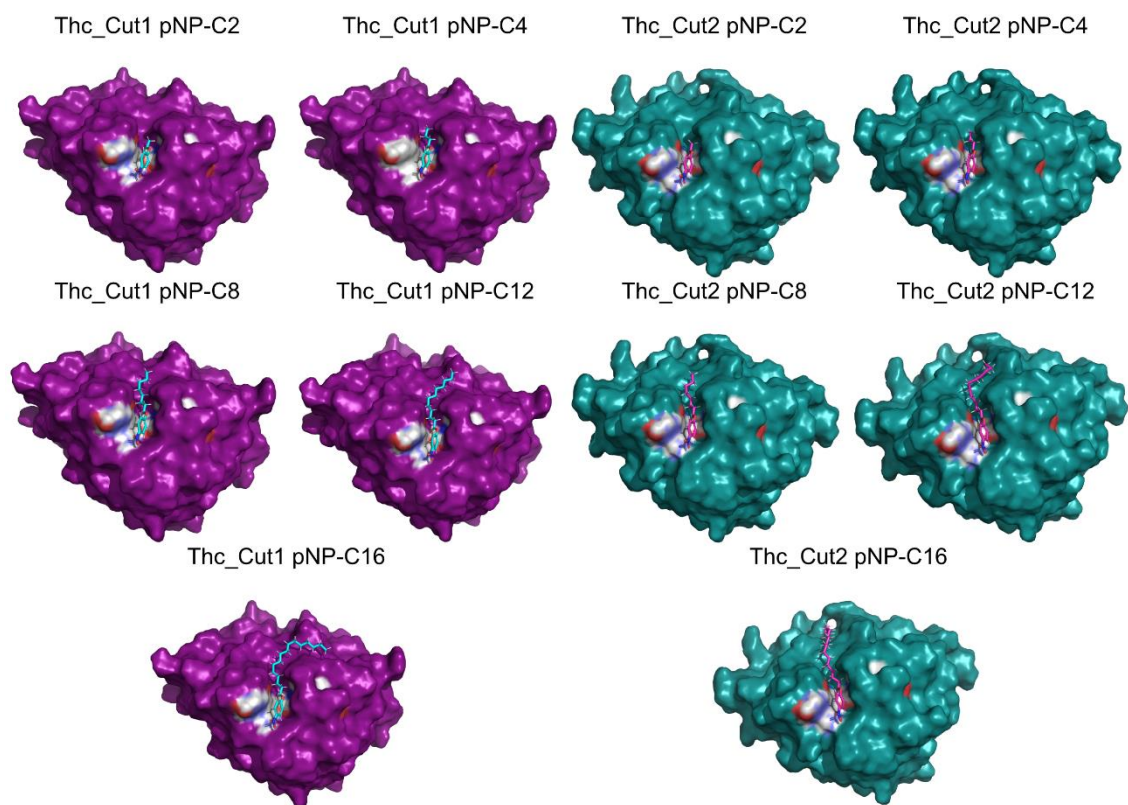

**Figure S10.** Thc\_Cut1 and Thc\_Cut2 docked with pNP-C2 to C16. Enzymes and ligands as indicated in the panels.

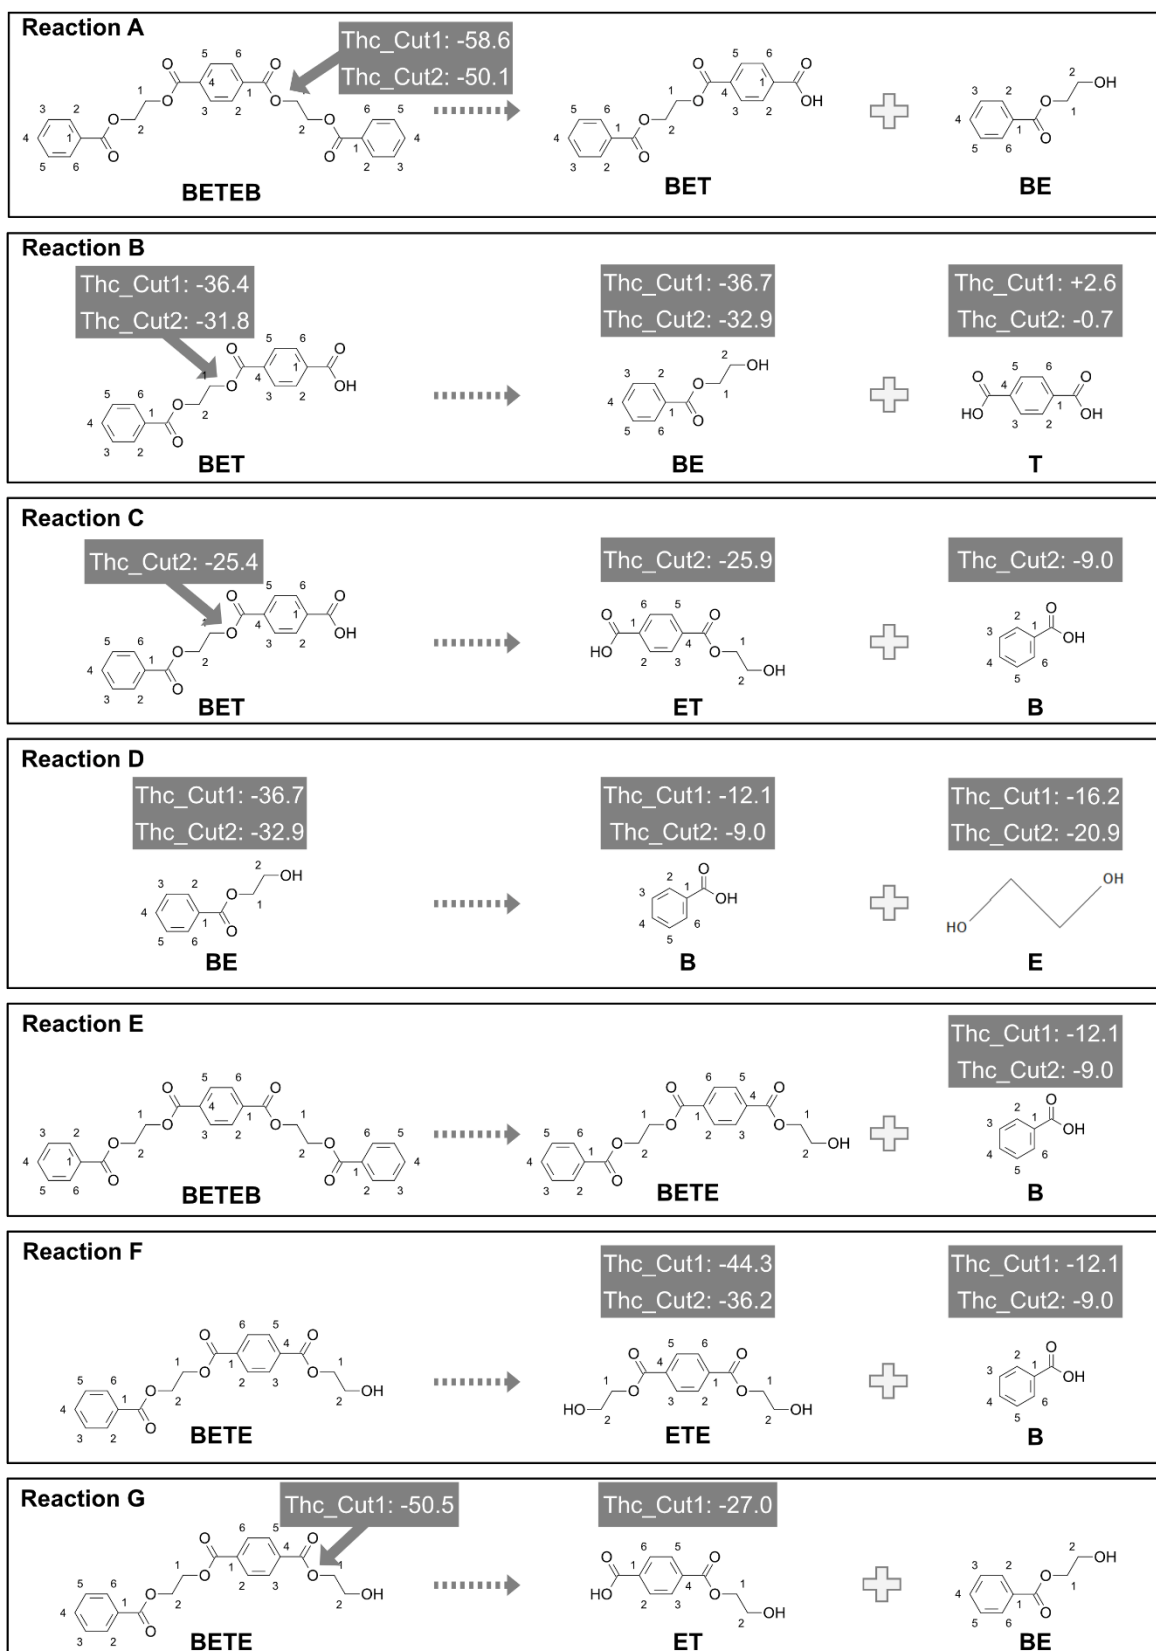

**Figure S11. Reactions involved in BETEB degradation by Thc\_Cut1 and Thc\_Cut2.** Results for docking analysis were added where possible and numbers are stating the binding energies in kcal mol<sup>-1</sup>. Binding energies and the corresponding docking scores are given in Table S3.

**Table S1.** Overview of amino acid differences and their location/function in The\_Cut1 and The\_Cut2.

|                        | Surface    | “Region 1” | The_Cut2 longer residue |
|------------------------|------------|------------|-------------------------|
| Amino acid differences | Ser/Arg19  | Asn/Arg29  | Ser/Arg19               |
| The_Cut1/The_Cut2      | Asn/Arg29  | Val/Arg30  | Asn/Arg29               |
|                        | Leu/Phe33  | Leu/Phe33  | Leu/Phe33               |
|                        | Ser/Gly34  | Ser/Gly34  | Ser/Asp36               |
|                        | Ser/Asp36  | Ser/Asp36  | Ile/Asn88               |
|                        | Glu/Gln65  | Glu/Gln65  | Glu/Arg99               |
|                        | Ile/Asn88  | Ile/Val68  | Thr/Arg166              |
|                        | Glu/Arg99  | Ile/Asn88  | Ala/Leu183              |
|                        | Asn/Asp106 | Glu/Arg99  |                         |
|                        | Arg/Asp111 | Asn/Asp106 |                         |
|                        | Thr/Ala115 | His/Tyr107 |                         |
|                        | Thr/Arg166 | Arg/Asp111 |                         |
|                        | Ala/Leu183 | Thr/Ala115 |                         |
|                        | Lys/Arg187 |            |                         |
|                        | Ser/Thr195 |            |                         |

**Table S2.** Results of docking analyzes of Thec\_Cut1 and Thec\_Cut2 with BETEB, ETE and pNP-C2 to C16<sup>a)</sup>.

|                  | Binding Energy [kcal mol <sup>-1</sup> ] | Docking Score |
|------------------|------------------------------------------|---------------|
| <b>Thec_Cut1</b> |                                          |               |
| BETEB            | -58.58                                   | -5.50         |
| ETE              | -44.34                                   | -2.93         |
| pNP-C2           | -36.51                                   | -4.42         |
| pNP-C4           | -42.96                                   | -4.24         |
| pNP-C8           | -51.85                                   | -2.59         |
| pNP-C12          | -59.64                                   | -4.74         |
| pNP-C16          | -67.03                                   | -4.90         |
| <b>Thec_Cut2</b> |                                          |               |
| BETEB            | -50.12                                   | -4.77         |
| ETE              | -36.82                                   | -1.46         |
| pNP-C2           | -35.76                                   | -4.55         |
| pNP-C4           | -42.75                                   | -4.75         |
| pNP-C8           | -51.81                                   | -2.70         |
| pNP-C12          | -55.23                                   | -4.86         |
| pNP-C16          | -61.34                                   | -4.12         |

a) Docking was performed with the Schrödinger Maestro software. All information on protein and ligand preparation, as well as chosen constraints can be found under Experimental procedures in the main article.

**Table S3.** Results of docking analyzes of The\_Cut1 and The\_Cut2 with BETEB and its degradation products<sup>a)</sup>

|                 | Binding Energy [kcal mol <sup>-1</sup> ] | Docking Score |
|-----------------|------------------------------------------|---------------|
| <b>The_Cut1</b> |                                          |               |
| BETEB           | -58.58                                   | -5.50         |
| BETE            | -50.45                                   | -6.20         |
| BET             | -36.37                                   | -6.16         |
| BE              | -35.72                                   | -4.80         |
| ETE             | -44.34                                   | -2.93         |
| T               | 2.59                                     | -5.38         |
| EG              | -16.21                                   | -2.24         |
| B               | -12.07                                   | -4.89         |
| ET              | -26.96                                   | -4.85         |
| <b>The_Cut2</b> |                                          |               |
| BETEB           | -50.12                                   | -4.77         |
| BETE            | <i>No pose</i>                           |               |
| BET-1           | -31.79                                   | -4.73         |
| BET-2           | -25.43                                   | -3.68         |
| BE              | -32.91                                   | -4.59         |
| ETE             | -36.82                                   | -1.46         |
| T               | -0.70                                    | -5.27         |
| EG              | -20.94                                   | -2.11         |
| B               | -9.03                                    | -5.11         |
| ET              | -25.93                                   | -4.58         |

a) Docking was performed with the Schrödinger Maestro software. Reactions are visualized in Figure S11. All information on protein and ligand preparation, as well as chosen constraints can be found in the materials and methods section in the main article.
